# Supplementary figures and images for: Determination of the DNA binding properties of a novel PARP inhibitor MK-4827 with calf-thymus DNA by molecular simulations and detailed spectroscopic investigations
Source: Royal Society of Chemistry journal article supplement (doi:10.1039/c9nj00667b), 2019-01-01

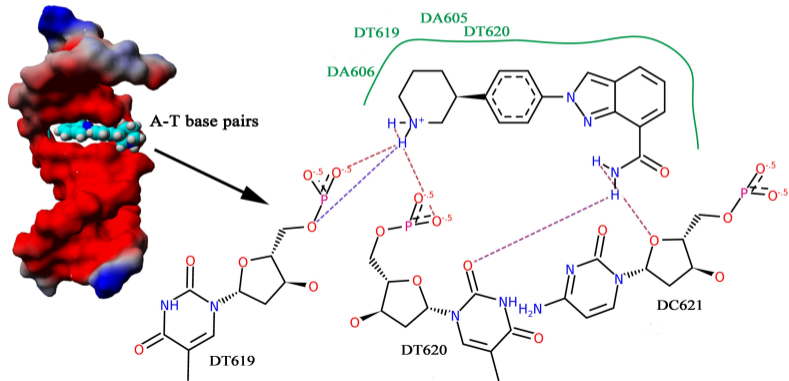

Supplement: c9nj00667b2.pdf [file c9nj00667b2.pdf]

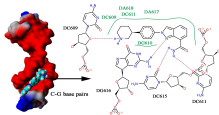

Supplement: c9nj00667b3.pdf [file c9nj00667b3.pdf]
